# Supplementary material for: Simultaneous measurement of the size and methylation of chromosome 4qA-D4Z4 repeats in facioscapulohumeral muscular dystrophy by long-read sequencing
Source: PubMed Central journal article supplement (PMC9644496; doi:10.1186/s12967-022-03743-7), 2022-11-08
Supplement: 12967_2022_3743_MOESM1_ESM.pdf [file 12967_2022_3743_MOESM1_ESM.pdf]

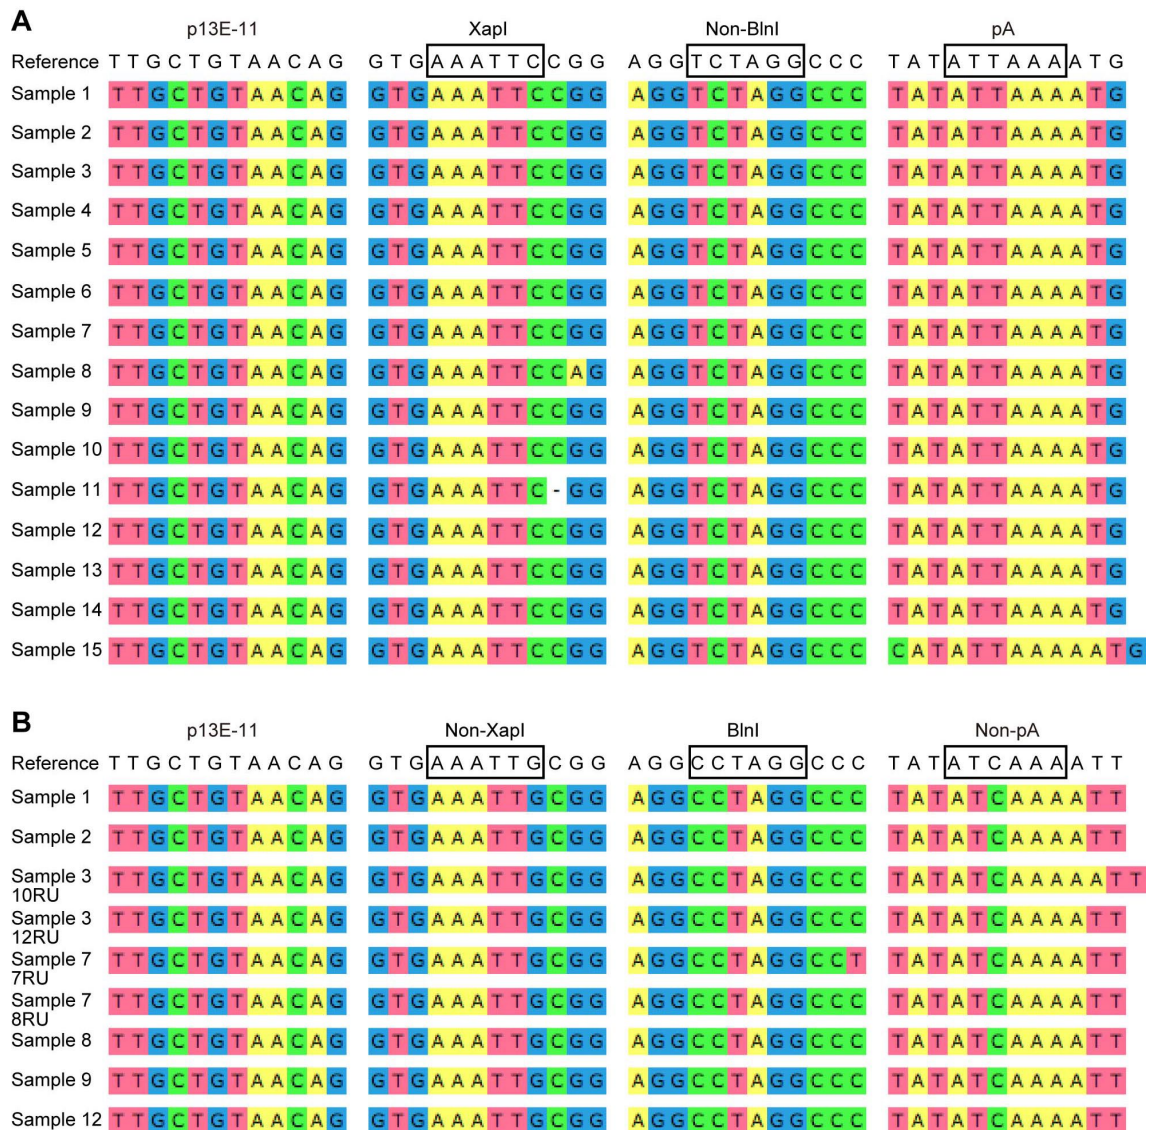

Fig. S1. Characteristic sequences detected on nCATS. (A) The sequences in the 4qA-derived representative read, and (B) the sequences in the 10q-derived representative read obtained from indicated samples. The XapI/non-XapI and BlnI/non-BlnI sites in the most distal D4Z4 RU are shown. In Samples 8, 14 and 15, the XapI site, the XapI and non-BlnI sites, and the non-XapI site in the second most distal D4Z4 RU, respectively are shown due to the difficulty to identify the restriction sites.

Table S1. The length of reads derived from 4qA locus in each patient.

| Sample ID | Direction | Length (bp) |
|-----------|-----------|-------------|
| Sample 1  | AntiSense | 5221        |
|           | Sense     | 5316        |
|           | AntiSense | 5372        |
|           | AntiSense | 5390        |
|           | Sense     | 5391        |
|           | Sense     | 5397        |
|           | Sense     | 5425        |
|           | AntiSense | 5428        |
|           | AntiSense | 5434        |
|           | Sense     | 5440        |
|           | AntiSense | 5449        |
|           | Sense     | 5469        |
|           | Sense     | 5794        |
| Sample 2  | Sense     | 8535        |
|           | AntiSense | 8575        |
|           | AntiSense | 8591        |
|           | AntiSense | 8611        |
|           | Sense     | 8619        |
|           | AntiSense | 8658        |
|           | AntiSense | 8676        |
|           | AntiSense | 8679        |
|           | Sense     | 8681        |
|           | AntiSense | 8700        |
|           | Sense     | 8703        |
|           | Sense     | 8720        |
|           | AntiSense | 8721        |
|           | Sense     | 8732        |
| AntiSense | 8976      |             |
| Sample 3  | AntiSense | 11659       |
|           | AntiSense | 11861       |
|           | AntiSense | 11872       |
|           | AntiSense | 11912       |
|           | AntiSense | 11922       |
|           | AntiSense | 11923       |
|           | AntiSense | 11924       |
|           | Sense     | 11952       |
|           | Sense     | 11967       |
|           | Sense     | 12010       |
|           | AntiSense | 11909       |
| Sample 4  | AntiSense | 14566       |
|           | Sense     | 14863       |
|           | Sense     | 15102       |
|           | AntiSense | 15102       |
|           | AntiSense | 15134       |
|           | Sense     | 15163       |
|           | AntiSense | 15165       |
|           | AntiSense | 15177       |

|           |           |       |
|-----------|-----------|-------|
|           | AntiSense | 15185 |
|           | AntiSense | 15217 |
|           | AntiSense | 15466 |
| Sample 5  | Sense     | 18383 |
|           | AntiSense | 18397 |
|           | AntiSense | 18404 |
|           | AntiSense | 18448 |
|           | Sense     | 18453 |
|           | Sense     | 18730 |
| Sample 6  | AntiSense | 5281  |
|           | Sense     | 5337  |
|           | AntiSense | 5735  |
|           | Sense     | 5737  |
|           | Sense     | 5742  |
|           | AntiSense | 5756  |
| Sample 7  | AntiSense | 37844 |
|           | AntiSense | 37903 |
|           | Sense     | 37923 |
|           | AntiSense | 37926 |
|           | Sense     | 37959 |
| Sample 8  | Sense     | 44517 |
| Sample 9  | AntiSense | 14511 |
|           | AntiSense | 14792 |
|           | AntiSense | 14851 |
|           | AntiSense | 14903 |
|           | Sense     | 14951 |
|           | Sense     | 15044 |
|           | Sense     | 15133 |
|           | Sense     | 15157 |
| Sample 10 | Sense     | 18042 |
|           | Sense     | 18067 |
|           | AntiSense | 18079 |
|           | AntiSense | 18151 |
|           | Sense     | 18313 |
|           | AntiSense | 18396 |
|           | Sense     | 18425 |
|           | AntiSense | 18434 |
|           | AntiSense | 18452 |
|           | AntiSense | 18466 |
|           | AntiSense | 18694 |
|           | Sense     | 18756 |
| Sample 11 | Sense     | 18450 |
|           | Sense     | 18460 |
|           | Sense     | 18412 |
| Sample 12 | Sense     | 18480 |
|           | AntiSense | 18513 |
|           | AntiSense | 18607 |
|           | Sense     | 18355 |
|           | Sense     | 12020 |

|           |           |       |
|-----------|-----------|-------|
| Sample 13 | Sense     | 11873 |
|           | Sense     | 11838 |
|           | AntiSense | 11838 |
|           | AntiSense | 10505 |
| Sample 14 | AntiSense | 10520 |
| Sample 15 | Sense     | 11596 |
|           | AntiSense | 11878 |

Table S2. The length of reads derived from 10q locus in each patient.

| Sample ID | Direction | Length (bp) |
|-----------|-----------|-------------|
| Sample 1  | Sense     | 44383       |
|           | Antisense | 44837       |
| Sample 2  | Antisense | 43595       |
|           | Antisense | 43780       |
|           | Sense     | 44612       |
| Sample 3  | Sense     | 34791       |
|           | Sense     | 34825       |
|           | Sense     | 41183       |
|           | Sense     | 41390       |
| Sample 7  | Sense     | 24845       |
|           | Sense     | 24872       |
|           | Antisense | 24905       |
|           | Sense     | 24980       |
|           | Antisense | 25002       |
|           | Sense     | 28081       |
|           | Antisense | 28116       |
|           | Sense     | 28194       |
|           | Antisense | 28246       |
|           | Sense     | 28301       |
| Antisense | 28335     |             |
| Sample 8  | Sense     | 41213       |
| Sample 9  | Antisense | 37844       |
|           | Antisense | 37871       |
|           | Antisense | 37879       |
|           | Sense     | 38166       |
|           | Sense     | 38487       |
| Sample 12 | Sense     | 41111       |
|           | Sense     | 41368       |

Table S3. The methylation rate at the entire D4Z4 RU of 4qA and 10q loci.

| Sample ID | locus | Methylation rate (%) |      |      |      |      |      |      |      |      |      |      |      |          |           |      |      |      |      |
|-----------|-------|----------------------|------|------|------|------|------|------|------|------|------|------|------|----------|-----------|------|------|------|------|
|           |       | D4Z4                 |      |      |      |      |      |      |      |      |      |      |      | 1        |           |      |      |      |      |
|           |       | 13                   | 12   | 11   | 10   | 9    | 8    | 7    | 6    | 5    | 4    | 3    | 2    | Promoter | Gene body |      |      |      |      |
| Sample 1  | 4qA   |                      |      |      |      |      |      |      |      |      |      |      |      |          | 0.9       | 4.4  |      |      |      |
|           |       |                      |      |      |      |      |      |      |      |      |      |      |      |          |           | 1.5  | 4.3  |      |      |
|           |       |                      |      |      |      |      |      |      |      |      |      |      |      |          |           | 1.6  | 0.0  |      |      |
|           |       |                      |      |      |      |      |      |      |      |      |      |      |      |          |           | 0.0  | 3.4  |      |      |
|           |       |                      |      |      |      |      |      |      |      |      |      |      |      |          |           | 4.4  | 0.0  |      |      |
|           |       |                      |      |      |      |      |      |      |      |      |      |      |      |          |           | 0.7  | 1.1  |      |      |
|           |       |                      |      |      |      |      |      |      |      |      |      |      |      |          |           | 0.0  | 3.7  |      |      |
|           |       |                      |      |      |      |      |      |      |      |      |      |      |      |          |           | 0.8  | 2.7  |      |      |
|           |       |                      |      |      |      |      |      |      |      |      |      |      |      |          |           | 14.1 | 30.5 |      |      |
|           |       |                      |      |      |      |      |      |      |      |      |      |      |      |          |           | 1.7  | 1.0  |      |      |
|           |       |                      |      |      |      |      |      |      |      |      |      |      |      |          |           | 4.2  | 6.8  |      |      |
|           |       |                      |      |      |      |      |      |      |      |      |      |      |      |          |           | 4.7  | 1.3  |      |      |
|           |       |                      |      |      |      |      |      |      |      |      |      |      |      |          |           | 7.1  | 4.2  |      |      |
|           |       | 10q                  | 22.7 | 8.8  | 10.1 | 24.4 | 13.8 | 18.9 | 40.6 | 35.3 | 48.4 | 44.9 | 66.0 | 66.1     | 56.5      | 36.4 |      |      |      |
|           |       | 4.1                  | 15.7 | 14.3 | 12.7 | 51.7 | 24.5 | 13.2 | 24.3 | 27.0 | 56.4 | 53.8 | 56.1 | 57.6     | 57.5      |      |      |      |      |
| Sample 2  | 4qA   |                      |      |      |      |      |      |      |      |      |      |      |      |          | 8.5       | 8.0  | 16.9 |      |      |
|           |       |                      |      |      |      |      |      |      |      |      |      |      |      |          |           | 6.4  | 7.1  | 14.7 |      |
|           |       |                      |      |      |      |      |      |      |      |      |      |      |      |          |           | 9.1  | 30.9 | 55.0 |      |
|           |       |                      |      |      |      |      |      |      |      |      |      |      |      |          |           | 1.7  | 10.5 | 11.9 |      |
|           |       |                      |      |      |      |      |      |      |      |      |      |      |      |          |           | 2.8  | 3.4  | 1.0  |      |
|           |       |                      |      |      |      |      |      |      |      |      |      |      |      |          |           | 5.6  | 22.1 | 3.9  |      |
|           |       |                      |      |      |      |      |      |      |      |      |      |      |      |          |           | 8.6  | 16.7 | 54.0 |      |
|           |       |                      |      |      |      |      |      |      |      |      |      |      |      |          |           | 4.5  | 11.4 | 19.4 |      |
|           |       |                      |      |      |      |      |      |      |      |      |      |      |      |          |           | 13.2 | 19.6 | 72.0 |      |
|           |       |                      |      |      |      |      |      |      |      |      |      |      |      |          |           | 2.8  | 17.6 | 23.9 |      |
|           |       |                      |      |      |      |      |      |      |      |      |      |      |      |          |           | 7.1  | 13.1 | 14.3 |      |
|           |       |                      |      |      |      |      |      |      |      |      |      |      |      |          |           | 0.8  | 3.1  | 4.8  |      |
|           |       |                      |      |      |      |      |      |      |      |      |      |      |      |          |           | 6.1  | 15.0 | 4.8  |      |
|           |       |                      |      |      |      |      |      |      |      |      |      |      |      |          | 16.8      | 22.8 | 56.3 |      |      |
|           |       |                      |      |      |      |      |      |      |      |      |      |      |      | 4.1      | 7.4       | 17.7 |      |      |      |
|           | 10q   | 13.0                 | 18.8 | 21.5 | 22.1 | 18.5 | 17.9 | 34.0 | 26.9 | 39.7 | 36.2 | 55.9 | 64.0 | 43.3     | 82.5      |      |      |      |      |
|           |       | 17.5                 | 21.8 | 47.1 | 47.6 | 80.3 | 52.8 | 57.3 | 86.5 | 92.5 | 80.6 | 69.8 | 72.5 | 66.7     | 84.8      |      |      |      |      |
|           |       | 18.9                 | 8.1  | 27.8 | 40.0 | 47.3 | 79.6 | 38.2 | 47.1 | 56.7 | 65.5 | 51.8 | 74.6 | 53.2     | 94.8      |      |      |      |      |
| Sample 3  | 4qA   |                      |      |      |      |      |      |      |      |      |      |      |      |          | 0.7       | 3.0  | 5.8  | 1.9  |      |
|           |       |                      |      |      |      |      |      |      |      |      |      |      |      |          |           | 2.8  | 3.7  | 6.1  | 39.1 |
|           |       |                      |      |      |      |      |      |      |      |      |      |      |      |          |           | 1.3  | 2.7  | 9.4  | 2.4  |
|           |       |                      |      |      |      |      |      |      |      |      |      |      |      |          |           | 5.6  | 0.4  | 2.8  | 0.0  |
|           |       |                      |      |      |      |      |      |      |      |      |      |      |      |          |           | 3.7  | 6.9  | 3.2  | 25.9 |
|           |       |                      |      |      |      |      |      |      |      |      |      |      |      |          |           | 3.5  | 1.2  | 1.7  | 29.4 |
|           |       |                      |      |      |      |      |      |      |      |      |      |      |      |          |           | 3.3  | 7.9  | 4.3  | 4.8  |
|           |       |                      |      |      |      |      |      |      |      |      |      |      |      |          |           | 1.3  | 4.4  | 0.0  | 0.0  |
|           |       |                      |      |      |      |      |      |      |      |      |      |      |      |          |           | 8.8  | 8.9  | 11.8 | 12.9 |
|           |       |                      |      |      |      |      |      |      |      |      |      |      |      |          |           | 0.6  | 1.3  | 2.4  | 8.1  |
|           |       |                      |      |      |      |      |      |      |      |      |      |      |      |          |           | 1.4  | 2.5  | 1.9  | 11.3 |
|           |       |                      | 10q  |      |      |      | 8.2  | 10.0 | 14.8 | 16.0 | 11.6 | 14.7 | 21.6 | 20.0     | 34.8      | 18.3 | 38.7 |      |      |
|           |       |                      |      |      |      |      | 45.5 | 66.0 | 63.4 | 74.6 | 81.0 | 87.0 | 89.3 | 93.1     | 92.9      | 77.9 | 92.9 |      |      |
|           |       |                      |      | 15.5 | 13.2 | 15.6 | 9.5  | 11.9 | 19.1 | 36.6 | 18.7 | 15.0 | 18.6 | 47.4     | 26.1      | 40.0 |      |      |      |
|           |       |                      | 11.3 | 6.8  | 5.5  | 6.1  | 17.2 | 16.3 | 10.7 | 12.5 | 11.2 | 9.1  | 16.8 | 31.6     | 50.0      |      |      |      |      |
|           |       |                      |      |      |      |      |      |      |      |      |      |      |      | 0.0      | 4.8       | 8.2  | 13.3 | 40.5 |      |
|           |       |                      |      |      |      |      |      |      |      |      |      |      |      | 6.1      | 18.5      | 16.9 | 26.5 | 24.5 |      |
|           |       |                      |      |      |      |      |      |      |      |      |      |      |      | 3.5      | 1.9       | 3.7  | 11.4 | 30.6 |      |
|           |       |                      |      |      |      |      |      |      |      |      |      |      |      | 0.4      | 7.8       | 1.6  | 0.8  | 4.1  |      |

|           |     |     |     |      |      |      |      |      |      |      |      |      |      |      |      |      |      |
|-----------|-----|-----|-----|------|------|------|------|------|------|------|------|------|------|------|------|------|------|
| Sample 4  | 4qA |     |     |      |      |      |      |      |      | 2.8  | 2.6  | 4.7  | 5.6  | 2.7  |      |      |      |
|           |     |     |     |      |      |      |      |      |      | 1.4  | 2.2  | 4.2  | 5.9  | 18.8 |      |      |      |
|           |     |     |     |      |      |      |      |      |      | 4.7  | 4.0  | 3.7  | 2.8  | 20.5 |      |      |      |
|           |     |     |     |      |      |      |      |      |      | 3.5  | 9.4  | 2.6  | 4.3  | 17.9 |      |      |      |
|           |     |     |     |      |      |      |      |      |      | 4.1  | 4.8  | 11.7 | 4.3  | 8.7  |      |      |      |
|           |     |     |     |      |      |      |      |      |      | 0.4  | 1.7  | 2.3  | 6.7  | 17.6 |      |      |      |
|           |     |     |     |      |      |      |      |      |      | 3.8  | 2.0  | 3.9  | 1.9  | 1.3  |      |      |      |
| Sample 5  | 4qA |     |     |      |      |      |      |      |      | 3.1  | 1.7  | 4.5  | 2.8  | 0.9  | 8.7  |      |      |
|           |     |     |     |      |      |      |      |      |      | 3.1  | 4.1  | 8.0  | 6.7  | 10.3 | 27.5 |      |      |
|           |     |     |     |      |      |      |      |      |      | 2.9  | 15.9 | 9.9  | 4.0  | 8.0  | 11.2 |      |      |
|           |     |     |     |      |      |      |      |      |      | 9.1  | 13.7 | 4.4  | 6.5  | 3.9  | 36.9 |      |      |
|           |     |     |     |      |      |      |      |      |      | 13.7 | 17.0 | 5.6  | 10.7 | 12.6 | 58.4 |      |      |
|           |     |     |     |      |      |      |      |      |      | 12.2 | 25.5 | 10.4 | 6.8  | 19.2 | 60.0 |      |      |
| Sample 6  | 4qA |     |     |      |      |      |      |      |      |      |      |      | 0.0  | 0.0  |      |      |      |
|           |     |     |     |      |      |      |      |      |      |      |      |      | 1.7  | 0.0  |      |      |      |
|           |     |     |     |      |      |      |      |      |      |      |      |      | 0.8  | 2.0  |      |      |      |
|           |     |     |     |      |      |      |      |      |      |      |      |      | 0.9  | 0.0  |      |      |      |
|           |     |     |     |      |      |      |      |      |      |      |      |      | 1.7  | 6.0  |      |      |      |
|           |     |     |     |      |      |      |      |      |      |      |      |      | 3.2  | 1.0  |      |      |      |
| Sample 7  | 4qA |     | 6.6 | 4.4  | 2.4  | 6.9  | 6.1  | 8.6  | 6.2  | 13.7 | 4.4  | 17.1 | 21.8 | 60.9 |      |      |      |
|           |     |     | 4.2 | 6.7  | 2.2  | 0.9  | 4.8  | 2.8  | 1.8  | 0.5  | 2.8  | 11.2 | 10.6 | 5.6  |      |      |      |
|           |     |     | 4.1 | 5.0  | 2.3  | 7.0  | 3.8  | 3.5  | 4.5  | 6.4  | 15.2 | 12.2 | 7.4  | 10.0 |      |      |      |
|           |     |     | 1.2 | 4.0  | 3.6  | 1.3  | 5.1  | 10.3 | 9.2  | 3.1  | 3.9  | 8.9  | 0.9  | 5.4  |      |      |      |
|           |     |     | 1.7 | 5.1  | 1.3  | 6.4  | 1.9  | 6.3  | 6.0  | 2.6  | 8.9  | 11.6 | 15.4 | 45.8 |      |      |      |
|           | 10q |     |     |      |      |      |      |      | 2.8  | 1.4  | 2.1  | 4.8  | 3.0  | 6.8  | 2.8  | 12.8 |      |
|           |     |     |     |      |      |      |      |      | 5.2  | 3.1  | 2.4  | 2.4  | 4.9  | 3.9  | 2.4  | 5.4  |      |
|           |     |     |     |      |      |      |      |      | 3.8  | 2.6  | 3.3  | 3.7  | 1.3  | 8.4  | 6.7  | 1.5  |      |
|           |     |     |     |      |      |      |      |      | 3.6  | 6.8  | 7.0  | 6.2  | 8.0  | 4.8  | 8.7  | 14.3 |      |
|           |     |     |     |      |      |      |      |      | 1.5  | 5.1  | 3.4  | 4.9  | 4.6  | 5.3  | 7.5  | 51.3 |      |
|           |     |     |     |      |      |      | 17.9 | 15.9 | 6.4  | 15.5 | 33.1 | 24.4 | 42.9 | 47.8 | 72.7 |      |      |
|           |     |     |     |      |      |      | 3.4  | 2.0  | 2.3  | 11.6 | 12.2 | 6.9  | 5.3  | 8.0  | 16.4 |      |      |
|           |     |     |     |      |      |      | 7.3  | 4.8  | 6.3  | 11.7 | 16.3 | 5.5  | 50.0 | 37.5 | 24.1 |      |      |
|           |     |     |     |      |      |      | 2.8  | 3.5  | 2.9  | 7.2  | 9.0  | 6.0  | 7.2  | 7.6  | 16.7 |      |      |
|           |     |     |     |      |      |      | 7.2  | 2.5  | 2.8  | 8.4  | 2.4  | 5.4  | 9.6  | 10.1 | 17.9 |      |      |
|           |     |     |     |      |      |      | 9.0  | 14.3 | 15.4 | 12.4 | 11.6 | 18.2 | 8.5  | 31.3 | 42.4 |      |      |
| Sample 8  | 4qA | 3.6 | 3.8 | 3.7  | 4.2  | 3.6  | 9.1  | 3.5  | 12.4 | 8.2  | 4.8  | 5.6  | 11.7 | 6.7  | 13.6 |      |      |
|           | 10q |     | 4.3 | 7.9  | 10.6 | 8.3  | 6.5  | 13.3 | 3.8  | 13.3 | 9.0  | 3.1  | 9.5  | 7.1  | 8.6  |      |      |
| Sample 9  | 4qA |     |     |      |      |      |      |      |      |      | 8.8  | 6.1  | 10.6 | 30.4 | 8.3  |      |      |
|           |     |     |     |      |      |      |      |      |      |      | 2.3  | 0.8  | 0.6  | 3.7  | 0.0  |      |      |
|           |     |     |     |      |      |      |      |      |      |      | 1.2  | 1.3  | 2.0  | 15.2 | 51.7 |      |      |
|           |     |     |     |      |      |      |      |      |      |      | 2.6  | 2.5  | 2.2  | 2.6  | 7.5  |      |      |
|           |     |     |     |      |      |      |      |      |      |      | 0.0  | 4.0  | 8.5  | 8.6  | 37.7 |      |      |
|           |     |     |     |      |      |      |      |      |      |      | 6.5  | 5.4  | 7.5  | 5.7  | 15.7 |      |      |
|           |     |     |     |      |      |      |      |      |      |      | 0.5  | 4.8  | 0.0  | 4.7  | 0.0  |      |      |
|           | 10q |     |     |      |      |      |      |      |      |      |      | 2.1  | 3.3  | 2.2  | 2.3  | 1.6  |      |
|           |     |     |     | 12.1 | 7.1  | 14.2 | 15.4 | 30.6 | 15.7 | 22.3 | 35.2 | 22.8 | 33.1 | 10.1 | 40.0 |      |      |
|           |     |     |     | 24.8 | 29.5 | 35.9 | 43.6 | 20.1 | 20.9 | 22.8 | 41.8 | 47.7 | 41.1 | 71.0 | 84.6 |      |      |
|           |     |     |     | 11.6 | 13.0 | 21.1 | 45.6 | 35.7 | 30.4 | 29.8 | 44.3 | 53.5 | 59.8 | 60.0 | 72.9 |      |      |
| Sample 10 | 4qA |     |     |      |      |      |      |      |      |      |      |      |      |      |      |      |      |
|           |     |     |     |      |      |      |      |      |      |      |      | 0.6  | 0.9  | 1.5  | 7.2  | 8.3  | 14.6 |
|           |     |     |     |      |      |      |      |      |      |      |      | 3.7  | 7.1  | 12.4 | 37.6 | 21.4 | 38.5 |
|           |     |     |     |      |      |      |      |      |      |      |      | 3.9  | 5.6  | 1.5  | 22.2 | 18.9 | 24.7 |
|           |     |     |     |      |      |      |      |      |      |      |      | 4.0  | 2.5  | 6.5  | 9.9  | 17.4 | 26.7 |
|           |     |     |     |      |      |      |      |      |      | 2.6  | 10.0 | 2.7  | 5.1  | 11.1 | 9.9  |      |      |
|           |     |     |     |      |      |      |      |      |      | 4.0  | 1.8  | 2.7  | 9.3  | 16.5 | 32.1 |      |      |
|           |     |     |     |      |      |      |      |      |      | 1.6  | 0.9  | 3.8  | 10.6 | 8.8  | 19.7 |      |      |

|           |      |     |      |      |      |      |      |      |      |      |      |      |      |      |      |
|-----------|------|-----|------|------|------|------|------|------|------|------|------|------|------|------|------|
|           |      |     |      |      |      |      |      |      | 0.8  | 2.4  | 10.5 | 7.3  | 31.3 | 3.8  |      |
|           |      |     |      |      |      |      |      |      | 2.7  | 6.5  | 8.9  | 8.3  | 23.0 | 44.0 |      |
|           |      |     |      |      |      |      |      |      | 2.7  | 8.4  | 4.0  | 6.9  | 12.3 | 17.9 |      |
|           |      |     |      |      |      |      |      |      | 6.0  | 11.8 | 11.3 | 27.3 | 15.5 | 71.4 |      |
|           |      |     |      |      |      |      |      |      | 4.9  | 8.8  | 12.4 | 17.3 | 10.4 | 42.6 |      |
| Sample 11 | 4qA  |     |      |      |      |      |      |      | 6.4  | 8.9  | 8.2  | 18.8 | 23.1 | 43.4 |      |
|           |      |     |      |      |      |      |      |      | 7.0  | 3.5  | 7.0  | 19.7 | 18.7 | 60.3 |      |
|           |      |     |      |      |      |      |      |      | 13.6 | 14.7 | 25.9 | 38.6 | 34.8 | 95.9 |      |
| Sample 12 | 4qA  |     |      |      |      |      |      |      | 4.6  | 4.8  | 3.2  | 11.6 | 7.0  | 57.0 |      |
|           |      |     |      |      |      |      |      |      | 8.4  | 9.2  | 17.0 | 9.3  | 12.8 | 19.5 |      |
|           |      |     |      |      |      |      |      |      | 3.7  | 2.5  | 3.2  | 6.0  | 14.4 | 10.6 |      |
|           |      |     |      |      |      |      |      |      | 1.9  | 2.6  | 3.0  | 3.0  | 7.7  | 0.0  |      |
|           | 10qA |     | 5.8  | 41.0 | 33.6 | 22.0 | 18.7 | 49.4 | 59.3 | 47.0 | 79.7 | 61.2 | 82.4 | 79.3 | 91.5 |
|           |      | 9.5 | 21.5 | 21.3 | 34.0 | 27.5 | 38.1 | 24.8 | 38.1 | 33.1 | 29.5 | 47.2 | 60.0 | 87.5 |      |
| Sample 13 | 4qA  |     |      |      |      |      |      |      |      |      | 3.5  | 0.8  | 1.6  | 8.9  |      |
|           |      |     |      |      |      |      |      |      |      |      | 1.2  | 7.8  | 2.9  | 12.3 |      |
|           |      |     |      |      |      |      |      |      |      |      |      | 13.5 | 22.4 | 17.6 | 39.2 |
|           |      |     |      |      |      |      |      |      |      |      |      | 31.0 | 17.3 | 15.8 | 83.6 |
|           |      |     |      |      |      |      |      |      |      |      |      | 1.4  | 1.3  | 4.7  | 1.2  |
| Sample 14 | 4qA  |     |      |      |      |      |      |      |      |      | 15.6 | 16.4 | 25.7 | 21.1 |      |
| Sample 15 | 4qA  |     |      |      |      |      |      |      |      |      |      | 1.3  | 16.9 | 4.5  | 15.8 |
|           |      |     |      |      |      |      |      |      |      |      |      | 5.2  | 7.8  | 51.6 | 41.7 |
